# Supplementary material
Source: HighWire-hosted journal article supplement (https://jnm.snmjournals.org/highwire/filestream/94712/field_highwire_adjunct_files/0/156711_Supplemental_Data.pdf)
Supplement: 156711_Supplemental_Data.pdf [file 156711_Supplemental_Data.pdf]

SUPPLEMENTAL TABLE 1. PET scanner specifications for the mCT and mMR.

| Parameter                                     | Biograph mCT         | Biograph mMR         |
|-----------------------------------------------|----------------------|----------------------|
| Detector material                             | LSO                  | LSO                  |
| Detector element dimension (mm <sup>3</sup> ) | 4×4×20               | 4×4×20               |
| Detector elements per block                   | 13×13                | 8×8                  |
| Total number of detector elements             | 32,448               | 28,672               |
| Signal readout                                | PMTs (2×2 per block) | APDs (3×3 per block) |
| Axial FOV (cm)                                | 21.8                 | 25.8                 |
| Transaxial FOV (cm)                           | 70                   | 60                   |
| Plane spacing (mm)                            | 2                    | 2                    |
| Image planes                                  | 109                  | 127                  |
| Coincidence time window (ns)                  | 4.1                  | 5.9                  |
| Energy window (keV)                           | 435–650              | 430–610              |
| Energy resolution (%)                         | 11                   | 14                   |
| System time resolution                        | 540 ps               | –                    |
| NEMA sensitivity (kcps/MBq)                   | 9.7                  | 15                   |

SUPPLEMENTAL TABLE 2. Contrast recovery results for the mCT.

| 400×400, 2 mm*   |      |      |         |
|------------------|------|------|---------|
| <sup>18</sup> F  |      |      |         |
| Sphere size      | OSEM | PSF  | PSF+TOF |
| 10               | 37.1 | 47.5 | 49.9    |
| 13               | 52.4 | 58.0 | 62.9    |
| 17               | 64.0 | 68.2 | 68.9    |
| 22               | 75.2 | 78.1 | 76.8    |
| 28               | 70.9 | 70.3 | 76.4    |
| 37               | 73.6 | 74.2 | 79.2    |
| <sup>11</sup> C  |      |      |         |
| Sphere size      | OSEM | PSF  | PSF+TOF |
| 10               | 36.7 | 42.4 | 40.1    |
| 13               | 52.6 | 57.6 | 61.7    |
| 17               | 57.2 | 61.3 | 64.8    |
| 22               | 73.7 | 76.1 | 74.1    |
| 28               | 71.7 | 71.1 | 76.4    |
| 37               | 75.0 | 74.9 | 78.2    |
| <sup>89</sup> Zr |      |      |         |
| Sphere size      | OSEM | PSF  | PSF+TOF |
| 10               | 31.6 | 32.1 | 37.5    |
| 13               | 41.5 | 45.3 | 46.2    |
| 17               | 48.5 | 53.2 | 52.5    |
| 22               | 58.4 | 61.5 | 61.6    |
| 28               | 64.6 | 65.5 | 71.0    |
| 37               | 73.4 | 73.3 | 76.8    |
| <sup>124</sup> I |      |      |         |
| Sphere size      | OSEM | PSF  | PSF+TOF |
| 10               | 27.0 | 27.6 | 29.0    |
| 13               | 35.6 | 43.9 | 46.6    |
| 17               | 51.3 | 57.9 | 57.8    |
| 22               | 63.0 | 66.6 | 66.2    |
| 28               | 60.3 | 60.9 | 73.0    |
| 37               | 69.5 | 67.4 | 77.8    |
| <sup>68</sup> Ga |      |      |         |
| Sphere size      | OSEM | PSF  | PSF+TOF |
| 10               | 32.3 | 34.0 | 36.0    |
| 13               | 46.8 | 54.2 | 55.6    |
| 17               | 60.9 | 64.2 | 64.9    |
| 22               | 67.7 | 71.9 | 71.5    |
| 28               | 68.9 | 69.3 | 75.7    |
| 37               | 73.9 | 73.6 | 79.0    |
| <sup>90</sup> Y  |      |      |         |
| Sphere size      | OSEM | PSF  | PSF+TOF |
| 10               | -    | 21.4 | 30.8    |
| 13               | -    | 38.6 | 40.3    |
| 17               | 33.5 | 38.8 | 46.1    |
| 22               | 46.9 | 48.5 | 60.3    |
| 28               | 40.1 | 33.2 | 53.2    |
| 37               | 61.8 | 58.0 | 58.5    |

\*Iteration number and subsets are defined in Table 1.

SUPPLEMENTAL TABLE 3. Contrast recovery results for the mMR.

| <b>344×344, 2 mm*</b>  |      |      |
|------------------------|------|------|
| <b><sup>18</sup>F</b>  |      |      |
| Sphere size            | OSEM | PSF  |
| 10                     | 49.0 | 45.4 |
| 13                     | 51.5 | 53.1 |
| 17                     | 66.9 | 69.3 |
| 22                     | 76.5 | 78.5 |
| 28                     | 63.2 | 63.7 |
| 37                     | 67.3 | 67.6 |
| <b><sup>11</sup>C</b>  |      |      |
| Sphere size            | OSEM | PSF  |
| 10                     | 41.8 | 37.5 |
| 13                     | 55.4 | 61.0 |
| 17                     | 66.8 | 70.5 |
| 22                     | 75.4 | 77.4 |
| 28                     | 65.4 | 65.5 |
| 37                     | 70.8 | 70.6 |
| <b><sup>89</sup>Zr</b> |      |      |
| Sphere size            | OSEM | PSF  |
| 10                     | 38.3 | 37.7 |
| 13                     | 50.6 | 52.1 |
| 17                     | 53.6 | 55.1 |
| 22                     | 58.9 | 60.3 |
| 28                     | 58.4 | 59.2 |
| 37                     | 61.6 | 62.3 |
| <b><sup>124</sup>I</b> |      |      |
| Sphere size            | OSEM | PSF  |
| 10                     | 39.2 | 36.1 |
| 13                     | 38.8 | 41.5 |
| 17                     | 60.1 | 66.5 |
| 22                     | 71.5 | 74.3 |
| 28                     | 61.8 | 62.8 |
| 37                     | 69.3 | 69.5 |
| <b><sup>68</sup>Ga</b> |      |      |
| Sphere size            | OSEM | PSF  |
| 10                     | 30.2 | 32.8 |
| 13                     | 43.2 | 47.3 |
| 17                     | 60.4 | 63.3 |
| 22                     | 72.7 | 74.6 |
| 28                     | 64.6 | 64.7 |
| 37                     | 71.3 | 70.9 |
| <b><sup>90</sup>Y</b>  |      |      |
| Sphere size            | OSEM | PSF  |
| 10                     | -    | 17.4 |
| 13                     | 38.9 | 44.6 |
| 17                     | 40.7 | 45.8 |
| 22                     | 55.0 | 56.2 |
| 28                     | 51.0 | 52.5 |
| 37                     | 52.6 | 55.0 |

\*Iteration number and subsets are defined in Table 1.

SUPPLEMENTAL TABLE 4. Mean and standard deviation (in parentheses) mCT spatial resolution.

|                  |           | 1 cm Offset |            | 10 cm Offset      |                       |             |
|------------------|-----------|-------------|------------|-------------------|-----------------------|-------------|
|                  |           | Transverse  | Axial      | Transverse Radial | Transverse Tangential | Axial       |
| <sup>18</sup> F  | FWHM (mm) | 4.3 (0.02)  | 4.7 (0.04) | 5.1 (0.02)        | 5.0 (0.03)            | 5.7 (0.001) |
|                  | FWTM (mm) | 8.5 (0.1)   | 9.2 (0.1)  | 9.4 (0.02)        | 9.9 (0.1)             | 10.6 (0.03) |
| <sup>11</sup> C  | FWHM (mm) | 4.4 (–)     | 4.6 (–)    | 5.1 (–)           | 5.0 (–)               | 5.8 (–)     |
|                  | FWTM (mm) | 8.7 (–)     | 9.1 (–)    | 9.3 (–)           | 10.1 (–)              | 11.0 (–)    |
| <sup>89</sup> Zr | FWHM (mm) | 4.4 (0.1)   | 4.7 (0.04) | 5.1 (0.02)        | 5.0 (0.03)            | 5.9 (0.1)   |
|                  | FWTM (mm) | 8.9 (0.1)   | 9.3 (0.1)  | 9.4 (0.1)         | 9.9 (0.2)             | 10.9 (0.2)  |
| <sup>124</sup> I | FWHM (mm) | 4.4 (0.05)  | 4.4 (0.1)  | 5.1 (0.005)       | 5.0 (0.02)            | 5.5 (0.04)  |
|                  | FWTM (mm) | 8.7 (0.1)   | 8.8 (0.2)  | 9.4 (0.1)         | 9.9 (0.03)            | 10.4 (0.1)  |
| <sup>68</sup> Ga | FWHM (mm) | 4.4 (0.05)  | 4.7 (0.02) | 5.1 (0.03)        | 5.0 (0.04)            | 5.8 (0.1)   |
|                  | FWTM (mm) | 8.9 (0.1)   | 9.4 (0.03) | 9.3 (0.1)         | 9.9 (0.1)             | 11.0 (0.2)  |
| <sup>90</sup> Y  | FWHM (mm) | 4.7 (–)     | 5.1 (–)    | 5.0 (–)           | 5.1 (–)               | 5.8 (–)     |
|                  | FWTM (mm) | 10.2 (–)    | 9.9 (–)    | 9.4 (–)           | 10.9 (–)              | 11.4 (–)    |

SUPPLEMENTAL TABLE 5. Mean and standard deviation (in parentheses) mMR spatial resolution.

|                  |           | 1 cm Offset |            | 10 cm Offset      |                       |            |
|------------------|-----------|-------------|------------|-------------------|-----------------------|------------|
|                  |           | Transverse  | Axial      | Transverse Radial | Transverse Tangential | Axial      |
| <sup>18</sup> F  | FWHM (mm) | 4.1 (0.2)   | 4.7 (0.04) | 5.2 (0.03)        | 4.7 (0.05)            | 6.6 (0.1)  |
|                  | FWTM (mm) | 8.0 (0.2)   | 9.2 (0.2)  | 9.5 (0.04)        | 11.8 (0.2)            | 12.4 (0.4) |
| <sup>11</sup> C  | FWHM (mm) | 4.1 (–)     | 4.6 (–)    | 5.2 (–)           | 4.7 (–)               | 6.8 (–)    |
|                  | FWTM (mm) | 8.1 (–)     | 9.7 (–)    | 9.6 (–)           | 11.7 (–)              | 12.9 (–)   |
| <sup>89</sup> Zr | FWHM (mm) | 4.1 (0.1)   | 4.9 (0.1)  | 5.2 (0.04)        | 4.8 (0.1)             | 6.7 (0.1)  |
|                  | FWTM (mm) | 8.1 (0.1)   | 9.7 (0.1)  | 9.5 (0.2)         | 11.6 (0.2)            | 12.7 (0.1) |
| <sup>124</sup> I | FWHM (mm) | 4.2 (0.1)   | 5.7 (0.1)  | 5.2 (0.02)        | 4.8 (0.1)             | 7.7 (0.1)  |
|                  | FWTM (mm) | 8.1 (0.1)   | 14.1 (0.1) | 9.6 (0.03)        | 11.9 (0.2)            | 17.0 (0.2) |
| <sup>68</sup> Ga | FWHM (mm) | 4.2 (0.1)   | 5.8 (0.03) | 5.3 (0.03)        | 4.8 (0.03)            | 7.8 (0.1)  |
|                  | FWTM (mm) | 8.0 (0.1)   | 14.4 (0.3) | 9.8 (0.1)         | 11.9 (0.01)           | 17.2 (0.4) |
| <sup>90</sup> Y  | FWHM (mm) | 4.2 (–)     | 4.9 (–)    | 5.2 (–)           | 4.8 (–)               | 6.8 (–)    |
|                  | FWTM (mm) | 8.1 (–)     | 9.4 (–)    | 9.9 (–)           | 12.1 (–)              | 13.5 (–)   |
